# Supplementary material
Source: MDPI journal article supplement (https://www.mdpi.com/2413-8851/7/2/40)
Supplement: s1 [file s1]

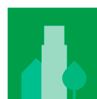**Table S1.** Distribution of soil carbon regulating ecosystem services in the state of Florida (USA) by soil order.

| Parameter                               | 2016 Total           | Degree of Weathering and Soil Development |                      |                      |                      |                      |                      |                      |
|-----------------------------------------|----------------------|-------------------------------------------|----------------------|----------------------|----------------------|----------------------|----------------------|----------------------|
|                                         |                      | Slight                                    |                      |                      | Moderate             |                      | Strong               |                      |
|                                         |                      | Entisols                                  | Inceptisols          | Histosols            | Alfisols             | Mollisols            | Spodosols            | Ultisols             |
| <b>2016 Area (km<sup>2</sup>)</b>       | 127,954.3            | 29,900.8                                  | 6946.3               | 11,770.8             | 15,372.5             | 5438.3               | 27,984.5             | 30,541.0             |
| <b>Soil organic carbon (SOC):</b>       |                      |                                           |                      |                      |                      |                      |                      |                      |
| Minimum (kg)                            | $1.0 \times 10^{12}$ | $5.4 \times 10^{10}$                      | $1.9 \times 10^{10}$ | $7.5 \times 10^{11}$ | $3.5 \times 10^{10}$ | $3.2 \times 10^{10}$ | $8.1 \times 10^{10}$ | $5.8 \times 10^{10}$ |
| Midpoint (kg)                           | $2.7 \times 10^{12}$ | $2.4 \times 10^{11}$                      | $6.2 \times 10^{10}$ | $1.6 \times 10^{12}$ | $1.2 \times 10^{11}$ | $7.3 \times 10^{10}$ | $3.4 \times 10^{11}$ | $2.2 \times 10^{11}$ |
| Maximum (kg)                            | $4.9 \times 10^{12}$ | $4.7 \times 10^{11}$                      | $1.2 \times 10^{11}$ | $2.9 \times 10^{12}$ | $2.2 \times 10^{11}$ | $1.2 \times 10^{11}$ | $7.1 \times 10^{11}$ | $4.2 \times 10^{11}$ |
| Minimum (SC-CO <sub>2</sub> , \$, USD)  | $1.7 \times 10^{11}$ | $9.0 \times 10^9$                         | $3.3 \times 10^9$    | $1.3 \times 10^{11}$ | $6.0 \times 10^9$    | $5.4 \times 10^9$    | $1.4 \times 10^{10}$ | $9.8 \times 10^9$    |
| Midpoint (SC-CO <sub>2</sub> , \$, USD) | $4.6 \times 10^{11}$ | $4.0 \times 10^{10}$                      | $1.0 \times 10^{10}$ | $2.8 \times 10^{11}$ | $2.0 \times 10^{10}$ | $1.2 \times 10^{10}$ | $5.8 \times 10^{10}$ | $3.7 \times 10^{10}$ |
| Maximum (SC-CO <sub>2</sub> , \$, USD)  | $8.3 \times 10^{11}$ | $8.0 \times 10^{10}$                      | $2.0 \times 10^{10}$ | $4.8 \times 10^{11}$ | $3.7 \times 10^{10}$ | $2.1 \times 10^{10}$ | $1.2 \times 10^{11}$ | $7.1 \times 10^{10}$ |
| <b>Soil inorganic carbon (SIC):</b>     |                      |                                           |                      |                      |                      |                      |                      |                      |
| Minimum (kg)                            | $1.3 \times 10^{11}$ | $5.7 \times 10^{10}$                      | $1.7 \times 10^{10}$ | $7.1 \times 10^9$    | $2.0 \times 10^{10}$ | $2.7 \times 10^{10}$ | $5.6 \times 10^9$    | 0.0                  |
| Midpoint (kg)                           | $3.5 \times 10^{11}$ | $1.4 \times 10^{11}$                      | $3.5 \times 10^{10}$ | $2.8 \times 10^{10}$ | $6.6 \times 10^{10}$ | $6.3 \times 10^{10}$ | $1.7 \times 10^{10}$ | 0.0                  |
| Maximum (kg)                            | $6.3 \times 10^{11}$ | $2.5 \times 10^{11}$                      | $5.8 \times 10^{10}$ | $5.9 \times 10^{10}$ | $1.2 \times 10^{11}$ | $1.1 \times 10^{11}$ | $3.1 \times 10^{10}$ | 0.0                  |
| Minimum (SC-CO <sub>2</sub> , \$, USD)  | $2.2 \times 10^{10}$ | $9.6 \times 10^9$                         | $2.9 \times 10^9$    | $1.2 \times 10^9$    | $3.4 \times 10^9$    | $4.5 \times 10^9$    | $8.4 \times 10^8$    | 0.0                  |
| Midpoint (SC-CO <sub>2</sub> , \$, USD) | $6.0 \times 10^{10}$ | $2.5 \times 10^{10}$                      | $6.0 \times 10^9$    | $4.8 \times 10^9$    | $1.1 \times 10^{10}$ | $1.0 \times 10^{10}$ | $2.8 \times 10^9$    | 0.0                  |
| Maximum (SC-CO <sub>2</sub> , \$, USD)  | $1.1 \times 10^{11}$ | $4.2 \times 10^{10}$                      | $9.9 \times 10^9$    | $9.9 \times 10^9$    | $2.1 \times 10^{10}$ | $1.8 \times 10^{10}$ | $5.3 \times 10^9$    | 0.0                  |
| <b>Total soil carbon (TSC):</b>         |                      |                                           |                      |                      |                      |                      |                      |                      |
| Minimum (kg)                            | $1.2 \times 10^{12}$ | $1.1 \times 10^{11}$                      | $3.7 \times 10^{10}$ | $7.6 \times 10^{11}$ | $5.5 \times 10^{10}$ | $5.9 \times 10^{10}$ | $8.7 \times 10^{10}$ | $5.8 \times 10^{10}$ |
| Midpoint (kg)                           | $3.1 \times 10^{12}$ | $3.8 \times 10^{11}$                      | $9.7 \times 10^{10}$ | $1.7 \times 10^{12}$ | $1.8 \times 10^{11}$ | $1.4 \times 10^{11}$ | $3.6 \times 10^{11}$ | $2.2 \times 10^{11}$ |
| Maximum (kg)                            | $5.6 \times 10^{12}$ | $7.2 \times 10^{11}$                      | $1.8 \times 10^{11}$ | $2.9 \times 10^{12}$ | $3.4 \times 10^{11}$ | $2.3 \times 10^{11}$ | $7.4 \times 10^{11}$ | $4.2 \times 10^{11}$ |
| Minimum (SC-CO <sub>2</sub> , \$, USD)  | $2.0 \times 10^{11}$ | $1.9 \times 10^{10}$                      | $6.2 \times 10^9$    | $1.3 \times 10^{11}$ | $9.4 \times 10^9$    | $9.9 \times 10^9$    | $1.5 \times 10^{10}$ | $9.8 \times 10^9$    |
| Midpoint (SC-CO <sub>2</sub> , \$, USD) | $5.1 \times 10^{11}$ | $6.5 \times 10^{10}$                      | $1.6 \times 10^{10}$ | $2.8 \times 10^{11}$ | $3.1 \times 10^{10}$ | $2.3 \times 10^{10}$ | $6.1 \times 10^{10}$ | $3.7 \times 10^{10}$ |
| Maximum (SC-CO <sub>2</sub> , \$, USD)  | $9.4 \times 10^{11}$ | $1.2 \times 10^{11}$                      | $3.0 \times 10^{10}$ | $4.9 \times 10^{11}$ | $5.7 \times 10^{10}$ | $3.9 \times 10^{10}$ | $1.3 \times 10^{11}$ | $7.1 \times 10^{10}$ |

**Table S2.** Increases in developed land and maximum potential for realized social costs of carbon (C) due to complete loss of total soil carbon (TSC) of developed land by soil order in Florida (USA) from 2001 to 2016.

| Parameter                                           | Total                | Degree of Weathering and Soil Development |                   |                      |                   |                   |                      |                   |
|-----------------------------------------------------|----------------------|-------------------------------------------|-------------------|----------------------|-------------------|-------------------|----------------------|-------------------|
|                                                     |                      | Slight                                    |                   |                      | Moderate          |                   | Strong               |                   |
|                                                     |                      | Entisols                                  | Inceptisols       | Histosols            | Alfisols          | Mollisols         | Spodosols            | Ultisols          |
| <b>Developed, open space (km<sup>2</sup>)</b>       | 242.9                | 45.4                                      | 18.0              | 9.6                  | 37.0              | 6.7               | 83.4                 | 42.9              |
| <b>Total soil carbon (TSC):</b>                     |                      |                                           |                   |                      |                   |                   |                      |                   |
| Minimum (kg)                                        | $1.4 \times 10^9$    | $1.7 \times 10^8$                         | $9.5 \times 10^7$ | $6.2 \times 10^8$    | $1.3 \times 10^8$ | $7.2 \times 10^7$ | $2.6 \times 10^8$    | $8.2 \times 10^7$ |
| Midpoint (kg)                                       | $4.2 \times 10^9$    | $5.8 \times 10^8$                         | $2.5 \times 10^8$ | $1.4 \times 10^9$    | $4.4 \times 10^8$ | $1.7 \times 10^8$ | $1.1 \times 10^9$    | $3.0 \times 10^8$ |
| Maximum (kg)                                        | $7.9 \times 10^9$    | $1.1 \times 10^9$                         | $4.6 \times 10^8$ | $2.4 \times 10^9$    | $8.2 \times 10^8$ | $2.8 \times 10^8$ | $2.2 \times 10^9$    | $6.0 \times 10^8$ |
| Minimum (SC-CO <sub>2</sub> , \$, USD)              | $2.4 \times 10^8$    | $2.8 \times 10^7$                         | $1.6 \times 10^7$ | $1.0 \times 10^8$    | $2.3 \times 10^7$ | $1.2 \times 10^7$ | $4.3 \times 10^7$    | $1.4 \times 10^7$ |
| Midpoint (SC-CO <sub>2</sub> , \$, USD)             | $7.1 \times 10^8$    | $9.9 \times 10^7$                         | $4.2 \times 10^7$ | $2.3 \times 10^8$    | $7.4 \times 10^7$ | $2.8 \times 10^7$ | $1.8 \times 10^8$    | $5.1 \times 10^7$ |
| Maximum (SC-CO <sub>2</sub> , \$, USD)              | $1.3 \times 10^9$    | $1.9 \times 10^8$                         | $7.8 \times 10^7$ | $4.0 \times 10^8$    | $1.4 \times 10^8$ | $4.8 \times 10^7$ | $3.7 \times 10^8$    | $1.0 \times 10^8$ |
| <b>Developed, medium intensity (km<sup>2</sup>)</b> | 695.2                | 273.4                                     | 31.7              | 17.2                 | 78.1              | 15.6              | 196.2                | 83.0              |
| <b>Total soil carbon (TSC):</b>                     |                      |                                           |                   |                      |                   |                   |                      |                   |
| Minimum (kg)                                        | $3.5 \times 10^9$    | $1.0 \times 10^9$                         | $1.7 \times 10^8$ | $1.1 \times 10^9$    | $2.8 \times 10^8$ | $1.7 \times 10^8$ | $6.1 \times 10^8$    | $1.6 \times 10^8$ |
| Midpoint (kg)                                       | $1.1 \times 10^{10}$ | $3.5 \times 10^9$                         | $4.4 \times 10^8$ | $2.5 \times 10^9$    | $9.2 \times 10^8$ | $3.9 \times 10^8$ | $2.5 \times 10^9$    | $5.9 \times 10^8$ |
| Maximum (kg)                                        | $2.0 \times 10^{10}$ | $6.6 \times 10^9$                         | $8.2 \times 10^8$ | $4.3 \times 10^9$    | $1.7 \times 10^9$ | $6.6 \times 10^8$ | $5.2 \times 10^9$    | $1.2 \times 10^9$ |
| Minimum (SC-CO <sub>2</sub> , \$, USD)              | $5.9 \times 10^8$    | $1.7 \times 10^8$                         | $2.8 \times 10^7$ | $1.9 \times 10^8$    | $4.8 \times 10^7$ | $2.8 \times 10^7$ | $1.0 \times 10^8$    | $2.7 \times 10^7$ |
| Midpoint (SC-CO <sub>2</sub> , \$, USD)             | $1.8 \times 10^9$    | $5.9 \times 10^8$                         | $7.5 \times 10^7$ | $4.1 \times 10^8$    | $1.6 \times 10^8$ | $6.6 \times 10^7$ | $4.3 \times 10^8$    | $1.0 \times 10^8$ |
| Maximum (SC-CO <sub>2</sub> , \$, USD)              | $3.5 \times 10^9$    | $1.1 \times 10^9$                         | $1.4 \times 10^8$ | $7.2 \times 10^8$    | $2.9 \times 10^8$ | $1.1 \times 10^8$ | $8.8 \times 10^8$    | $1.9 \times 10^8$ |
| <b>Developed, low intensity (km<sup>2</sup>)</b>    | 528.2                | 177.9                                     | 26.5              | 12.9                 | 74.2              | 10.8              | 158.3                | 67.6              |
| <b>Total soil carbon (TSC):</b>                     |                      |                                           |                   |                      |                   |                   |                      |                   |
| Minimum (kg)                                        | $2.6 \times 10^9$    | $6.6 \times 10^8$                         | $1.4 \times 10^8$ | $8.3 \times 10^8$    | $2.7 \times 10^8$ | $1.2 \times 10^8$ | $4.9 \times 10^8$    | $1.3 \times 10^8$ |
| Midpoint (kg)                                       | $8.2 \times 10^9$    | $2.3 \times 10^9$                         | $3.7 \times 10^8$ | $1.8 \times 10^9$    | $8.8 \times 10^8$ | $2.7 \times 10^8$ | $2.0 \times 10^9$    | $4.8 \times 10^8$ |
| Maximum (kg)                                        | $1.5 \times 10^{10}$ | $4.3 \times 10^9$                         | $6.8 \times 10^8$ | $3.2 \times 10^9$    | $1.6 \times 10^9$ | $4.6 \times 10^8$ | $4.2 \times 10^9$    | $9.4 \times 10^8$ |
| Minimum (SC-CO <sub>2</sub> , \$, USD)              | $4.4 \times 10^8$    | $1.1 \times 10^8$                         | $2.4 \times 10^7$ | $1.4 \times 10^8$    | $4.5 \times 10^7$ | $2.0 \times 10^7$ | $8.2 \times 10^7$    | $2.2 \times 10^7$ |
| Midpoint (SC-CO <sub>2</sub> , \$, USD)             | $1.4 \times 10^9$    | $3.9 \times 10^8$                         | $6.3 \times 10^7$ | $3.1 \times 10^8$    | $1.5 \times 10^8$ | $4.5 \times 10^7$ | $3.4 \times 10^8$    | $8.1 \times 10^7$ |
| Maximum (SC-CO <sub>2</sub> , \$, USD)              | $2.6 \times 10^9$    | $7.3 \times 10^8$                         | $1.2 \times 10^8$ | $5.4 \times 10^8$    | $2.8 \times 10^8$ | $7.7 \times 10^7$ | $7.1 \times 10^8$    | $1.6 \times 10^8$ |
| <b>Developed, high intensity (km<sup>2</sup>)</b>   | 210.0                | 81.8                                      | 9.5               | 6.8                  | 20.3              | 5.8               | 60.2                 | 25.6              |
| <b>Total soil carbon (TSC):</b>                     |                      |                                           |                   |                      |                   |                   |                      |                   |
| Minimum (kg)                                        | $1.2 \times 10^9$    | $3.0 \times 10^8$                         | $5.0 \times 10^7$ | $4.4 \times 10^8$    | $7.3 \times 10^7$ | $6.3 \times 10^7$ | $1.9 \times 10^8$    | $4.9 \times 10^7$ |
| Midpoint (kg)                                       | $3.5 \times 10^9$    | $1.0 \times 10^9$                         | $1.3 \times 10^8$ | $9.7 \times 10^8$    | $2.4 \times 10^8$ | $1.5 \times 10^8$ | $7.8 \times 10^8$    | $1.8 \times 10^8$ |
| Maximum (kg)                                        | $6.6 \times 10^9$    | $2.0 \times 10^9$                         | $2.5 \times 10^8$ | $1.7 \times 10^9$    | $4.5 \times 10^8$ | $2.5 \times 10^8$ | $1.6 \times 10^9$    | $3.6 \times 10^8$ |
| Minimum (SC-CO <sub>2</sub> , \$, USD)              | $2.0 \times 10^8$    | $5.1 \times 10^7$                         | $8.5 \times 10^6$ | $7.4 \times 10^7$    | $1.2 \times 10^7$ | $1.1 \times 10^7$ | $3.1 \times 10^7$    | $8.2 \times 10^6$ |
| Midpoint (SC-CO <sub>2</sub> , \$, USD)             | $5.9 \times 10^8$    | $1.8 \times 10^8$                         | $2.2 \times 10^7$ | $1.6 \times 10^8$    | $4.0 \times 10^7$ | $2.4 \times 10^7$ | $1.3 \times 10^8$    | $3.1 \times 10^7$ |
| Maximum (SC-CO <sub>2</sub> , \$, USD)              | $1.1 \times 10^9$    | $3.3 \times 10^8$                         | $4.1 \times 10^7$ | $2.9 \times 10^8$    | $7.6 \times 10^7$ | $4.2 \times 10^7$ | $2.7 \times 10^8$    | $6.0 \times 10^7$ |
| <b>Total area (km<sup>2</sup>)</b>                  | 1676.3               | 578.5                                     | 85.7              | 46.5                 | 209.6             | 38.8              | 498.1                | 219.1             |
| <b>Total soil carbon (TSC):</b>                     |                      |                                           |                   |                      |                   |                   |                      |                   |
| Minimum (kg)                                        | $8.7 \times 10^9$    | $2.1 \times 10^9$                         | $4.5 \times 10^8$ | $3.0 \times 10^9$    | $7.5 \times 10^8$ | $4.2 \times 10^8$ | $1.5 \times 10^9$    | $4.2 \times 10^8$ |
| Midpoint (kg)                                       | $2.7 \times 10^{10}$ | $7.4 \times 10^9$                         | $1.2 \times 10^9$ | $6.6 \times 10^9$    | $2.5 \times 10^9$ | $9.7 \times 10^8$ | $6.4 \times 10^9$    | $1.6 \times 10^9$ |
| Maximum (kg)                                        | $5.0 \times 10^{10}$ | $1.4 \times 10^{10}$                      | $2.2 \times 10^9$ | $1.2 \times 10^{10}$ | $4.7 \times 10^9$ | $1.6 \times 10^9$ | $1.3 \times 10^{10}$ | $3.0 \times 10^9$ |
| Minimum (SC-CO <sub>2</sub> , \$, USD)              | $1.5 \times 10^9$    | $3.6 \times 10^8$                         | $7.6 \times 10^7$ | $5.1 \times 10^8$    | $1.3 \times 10^8$ | $7.1 \times 10^7$ | $2.6 \times 10^8$    | $7.0 \times 10^7$ |
| Midpoint (SC-CO <sub>2</sub> , \$, USD)             | $4.5 \times 10^9$    | $1.3 \times 10^9$                         | $2.0 \times 10^8$ | $1.1 \times 10^9$    | $4.2 \times 10^8$ | $1.6 \times 10^8$ | $1.1 \times 10^9$    | $2.6 \times 10^8$ |
| Maximum (SC-CO <sub>2</sub> , \$, USD)              | $8.5 \times 10^9$    | $2.4 \times 10^9$                         | $3.7 \times 10^8$ | $2.0 \times 10^9$    | $7.8 \times 10^8$ | 2.8v              | $2.2 \times 10^9$    | $5.1 \times 10^8$ |

**Table S3.** Developed land and maximum potential for realized social costs of carbon (C) due to complete loss of total soil carbon (TSC) of developed land by soil order in Florida (USA) prior and through 2016.

| Parameter                                           | Total                | Degree of Weathering and Soil Development |                      |                      |                      |                      |                      |                      |
|-----------------------------------------------------|----------------------|-------------------------------------------|----------------------|----------------------|----------------------|----------------------|----------------------|----------------------|
|                                                     |                      | Slight                                    |                      |                      | Moderate             |                      | Strong               |                      |
|                                                     |                      | Entisols                                  | Inceptisols          | Histosols            | Alfisols             | Mollisols            | Spodosols            | Ultisols             |
| <b>Developed, open space (km<sup>2</sup>)</b>       | 10,187.2             | 3462.0                                    | 393.9                | 226.7                | 1094.4               | 211.0                | 2563.8               | 2235.4               |
| <b>Total soil carbon (TSC):</b>                     |                      |                                           |                      |                      |                      |                      |                      |                      |
| Minimum (kg)                                        | $4.8 \times 10^{10}$ | $1.3 \times 10^{10}$                      | $2.1 \times 10^9$    | $1.5 \times 10^{10}$ | $3.9 \times 10^9$    | $2.3 \times 10^9$    | $7.9 \times 10^9$    | $4.2 \times 10^9$    |
| Midpoint (kg)                                       | $1.5 \times 10^{11}$ | $4.4 \times 10^{10}$                      | $5.5 \times 10^9$    | $3.2 \times 10^{10}$ | $1.3 \times 10^8$    | $5.3 \times 10^9$    | $3.3 \times 10^{10}$ | $1.6 \times 10^{10}$ |
| Maximum (kg)                                        | $2.8 \times 10^{11}$ | $8.4 \times 10^{10}$                      | $1.0 \times 10^{10}$ | $5.6 \times 10^{10}$ | $2.4 \times 10^{10}$ | $9.0 \times 10^9$    | $6.8 \times 10^{10}$ | $3.1 \times 10^{10}$ |
| Minimum (SC-CO <sub>2</sub> , \$, USD)              | $8.1 \times 10^9$    | $2.1 \times 10^9$                         | $3.5 \times 10^8$    | $2.5 \times 10^9$    | $6.7 \times 10^8$    | $3.8 \times 10^8$    | $1.3 \times 10^9$    | $7.2 \times 10^8$    |
| Midpoint (SC-CO <sub>2</sub> , \$, USD)             | $2.5 \times 10^{10}$ | $7.5 \times 10^9$                         | $9.3 \times 10^8$    | $5.4 \times 10^9$    | $2.2 \times 10^9$    | $8.9 \times 10^8$    | $5.6 \times 10^9$    | $2.7 \times 10^9$    |
| Maximum (SC-CO <sub>2</sub> , \$, USD)              | $4.8 \times 10^{10}$ | $1.4 \times 10^{10}$                      | $1.7 \times 10^9$    | $9.5 \times 10^9$    | $4.1 \times 10^9$    | $1.5 \times 10^9$    | $1.2 \times 10^{10}$ | $5.2 \times 10^9$    |
| <b>Developed, medium intensity (km<sup>2</sup>)</b> | 2930.0               | 1317.3                                    | 108.3                | 64.3                 | 251.2                | 71.6                 | 704.6                | 412.7                |
| <b>Total soil carbon (TSC):</b>                     |                      |                                           |                      |                      |                      |                      |                      |                      |
| Minimum (kg)                                        | $1.4 \times 10^{10}$ | $4.9 \times 10^9$                         | $5.7 \times 10^8$    | $4.1 \times 10^9$    | $9.0 \times 10^8$    | $7.7 \times 10^8$    | $2.2 \times 10^9$    | $7.8 \times 10^8$    |
| Midpoint (kg)                                       | $4.4 \times 10^{10}$ | $1.7 \times 10^{10}$                      | $1.5 \times 10^9$    | $9.2 \times 10^9$    | $3.0 \times 10^9$    | $1.8 \times 10^9$    | $9.1 \times 10^9$    | $2.9 \times 10^9$    |
| Maximum (kg)                                        | $8.4 \times 10^{10}$ | $3.2 \times 10^{10}$                      | $2.8 \times 10^9$    | $1.6 \times 10^{10}$ | $5.6 \times 10^9$    | $3.0 \times 10^9$    | $1.9 \times 10^{10}$ | $5.7 \times 10^9$    |
| Minimum (SC-CO <sub>2</sub> , \$, USD)              | $2.4 \times 10^9$    | $8.2 \times 10^8$                         | $9.6 \times 10^7$    | $7.0 \times 10^8$    | $1.5 \times 10^8$    | $1.3 \times 10^8$    | $3.7 \times 10^8$    | $1.3 \times 10^8$    |
| Midpoint (SC-CO <sub>2</sub> , \$, USD)             | $7.5 \times 10^9$    | $2.9 \times 10^9$                         | $2.6 \times 10^8$    | $1.5 \times 10^9$    | $5.0 \times 10^8$    | $3.0 \times 10^8$    | $1.5 \times 10^9$    | $5.0 \times 10^8$    |
| Maximum (SC-CO <sub>2</sub> , \$, USD)              | $1.4 \times 10^{10}$ | $5.4 \times 10^9$                         | $4.7 \times 10^8$    | $2.7 \times 10^9$    | $9.4 \times 10^8$    | $5.1 \times 10^8$    | $3.2 \times 10^9$    | $9.7 \times 10^8$    |
| <b>Developed, low intensity (km<sup>2</sup>)</b>    | 6254.8               | 2564.2                                    | 234.2                | 121.5                | 574.7                | 131.5                | 1612.2               | 1016.5               |
| <b>Total soil carbon (TSC):</b>                     |                      |                                           |                      |                      |                      |                      |                      |                      |
| Minimum (kg)                                        | $2.9 \times 10^{10}$ | $9.5 \times 10^9$                         | $1.2 \times 10^9$    | $7.8 \times 10^9$    | $2.1 \times 10^9$    | $1.4 \times 10^9$    | $5.0 \times 10^9$    | $1.9 \times 10^9$    |
| Midpoint (kg)                                       | $9.2 \times 10^{10}$ | $3.3 \times 10^{10}$                      | $3.3 \times 10^9$    | $1.7 \times 10^{10}$ | $6.8 \times 10^9$    | $3.3 \times 10^9$    | $2.1 \times 10^{10}$ | $7.2 \times 10^9$    |
| Maximum (kg)                                        | $1.7 \times 10^{11}$ | $6.2 \times 10^{10}$                      | $6.0 \times 10^9$    | $3.0 \times 10^{10}$ | $1.3 \times 10^{10}$ | $5.6 \times 10^9$    | $4.3 \times 10^{10}$ | $1.4 \times 10^{10}$ |
| Minimum (SC-CO <sub>2</sub> , \$, USD)              | $4.9 \times 10^9$    | $1.6 \times 10^9$                         | $2.1 \times 10^8$    | $1.3 \times 10^9$    | $3.5 \times 10^8$    | $2.4 \times 10^8$    | $8.4 \times 10^8$    | $3.3 \times 10^8$    |
| Midpoint (SC-CO <sub>2</sub> , \$, USD)             | $1.5 \times 10^{10}$ | $5.6 \times 10^9$                         | $5.5 \times 10^8$    | $2.9 \times 10^9$    | $1.1 \times 10^9$    | $5.5 \times 10^8$    | $3.5 \times 10^9$    | $1.2 \times 10^9$    |
| Maximum (SC-CO <sub>2</sub> , \$, USD)              | $2.9 \times 10^{10}$ | $1.0 \times 10^{10}$                      | $1.0 \times 10^9$    | $5.1 \times 10^9$    | $2.1 \times 10^9$    | $9.4 \times 10^8$    | $7.2 \times 10^9$    | $2.4 \times 10^9$    |
| <b>Developed, high intensity (km<sup>2</sup>)</b>   | 877.6                | 386.2                                     | 24.2                 | 19.1                 | 59.5                 | 20.2                 | 202.8                | 165.5                |
| <b>Total soil carbon (TSC):</b>                     |                      |                                           |                      |                      |                      |                      |                      |                      |
| Minimum (kg)                                        | $4.2 \times 10^9$    | $1.4 \times 10^9$                         | $1.3 \times 10^8$    | $1.2 \times 10^9$    | $2.1 \times 10^8$    | $2.2 \times 10^8$    | $6.3 \times 10^8$    | $3.1 \times 10^8$    |
| Midpoint (kg)                                       | $1.3 \times 10^{10}$ | $4.9 \times 10^9$                         | $3.4 \times 10^8$    | $2.7 \times 10^9$    | $7.0 \times 10^8$    | $5.1 \times 10^8$    | $2.6 \times 10^9$    | $1.2 \times 10^9$    |
| Maximum (kg)                                        | $2.5 \times 10^{10}$ | $9.3 \times 10^9$                         | $6.2 \times 10^8$    | $4.8 \times 10^9$    | $1.3 \times 10^9$    | $8.6 \times 10^8$    | $5.4 \times 10^9$    | $2.3 \times 10^9$    |
| Minimum (SC-CO <sub>2</sub> , \$, USD)              | $7.0 \times 10^8$    | $2.4 \times 10^8$                         | $2.2 \times 10^7$    | $2.1 \times 10^8$    | $3.6 \times 10^7$    | $3.7 \times 10^7$    | $1.1 \times 10^8$    | $5.3 \times 10^7$    |
| Midpoint (SC-CO <sub>2</sub> , \$, USD)             | $2.2 \times 10^9$    | $8.4 \times 10^8$                         | $5.7 \times 10^7$    | $4.6 \times 10^8$    | $1.2 \times 10^8$    | $8.5 \times 10^7$    | $4.4 \times 10^8$    | $2.0 \times 10^8$    |
| Maximum (SC-CO <sub>2</sub> , \$, USD)              | $4.2 \times 10^9$    | $1.6 \times 10^9$                         | $1.1 \times 10^8$    | $8.0 \times 10^8$    | $2.2 \times 10^8$    | $1.4 \times 10^8$    | $9.1 \times 10^8$    | $3.9 \times 10^8$    |
| <b>Total area (km<sup>2</sup>)</b>                  | 20,249.6             | 7729.6                                    | 760.6                | 431.6                | 1979.8               | 434.3                | 5083.5               | 3830.1               |
| <b>Total soil carbon (TSC):</b>                     |                      |                                           |                      |                      |                      |                      |                      |                      |
| Minimum (kg)                                        | $9.5 \times 10^{10}$ | $2.9 \times 10^{10}$                      | $4.0 \times 10^9$    | $2.8 \times 10^{10}$ | $7.1 \times 10^9$    | $4.7 \times 10^9$    | $1.6 \times 10^{10}$ | $7.3 \times 10^9$    |
| Midpoint (kg)                                       | $3.0 \times 10^{11}$ | $9.9 \times 10^{10}$                      | $1.1 \times 10^{10}$ | $6.2 \times 10^{10}$ | $2.3 \times 10^{10}$ | $1.1 \times 10^{10}$ | $6.6 \times 10^{10}$ | $2.7 \times 10^{10}$ |
| Maximum (kg)                                        | $5.6 \times 10^{11}$ | $1.9 \times 10^{11}$                      | $2.0 \times 10^{10}$ | $1.1 \times 10^{11}$ | $4.4 \times 10^{10}$ | $1.8 \times 10^{10}$ | $1.4 \times 10^{11}$ | $5.3 \times 10^{10}$ |
| Minimum (SC-CO <sub>2</sub> , \$, USD)              | $1.6 \times 10^{10}$ | $4.8 \times 10^9$                         | $6.8 \times 10^8$    | $4.7 \times 10^9$    | $1.2 \times 10^9$    | $7.9 \times 10^8$    | $2.6 \times 10^9$    | $1.2 \times 10^9$    |
| Midpoint (SC-CO <sub>2</sub> , \$, USD)             | $5.0 \times 10^{10}$ | $1.7 \times 10^{10}$                      | $1.8 \times 10^9$    | $1.0 \times 10^{10}$ | $3.9 \times 10^9$    | $1.8 \times 10^9$    | $1.1 \times 10^{10}$ | $4.6 \times 10^9$    |
| Maximum (SC-CO <sub>2</sub> , \$, USD)              | $9.5 \times 10^{10}$ | $3.2 \times 10^{10}$                      | $3.3 \times 10^9$    | $1.8 \times 10^{10}$ | $7.4 \times 10^9$    | $3.1 \times 10^9$    | $2.3 \times 10^{10}$ | $9.0 \times 10^9$    |
